# Supplementary material for: Pulmonary Application of Novel Antigen-Loaded Chitosan Nano-Particles Co-Administered with the Mucosal Adjuvant C-Di-AMP Resulted in Enhanced Immune Stimulation and Dose Sparing Capacity
Source: MDPI journal article supplement (doi:10.3390/pharmaceutics15041238), 2023-04-13
Supplement: s1 [file s1]

## Supplementary information:

Single cell suspensions derived from draining LNs (cervical LNs), lung and spleens were stained with Abs for viability (Live/dead), Thy1.1, CD3<sup>+</sup>, CD4<sup>+</sup> and CD8<sup>+</sup> and analyzed by flow cytometry. The gating strategy is shown in **Supplementary Figure S1**. The proliferation of Thy1.1 CD4<sup>+</sup> (**Fig. 5 A-B**) or CD8<sup>+</sup> transferred T cells (**Fig. 5 C-D**) was measured by CFSE dilution (loss of CFSE intensity) and is shown as histograms.

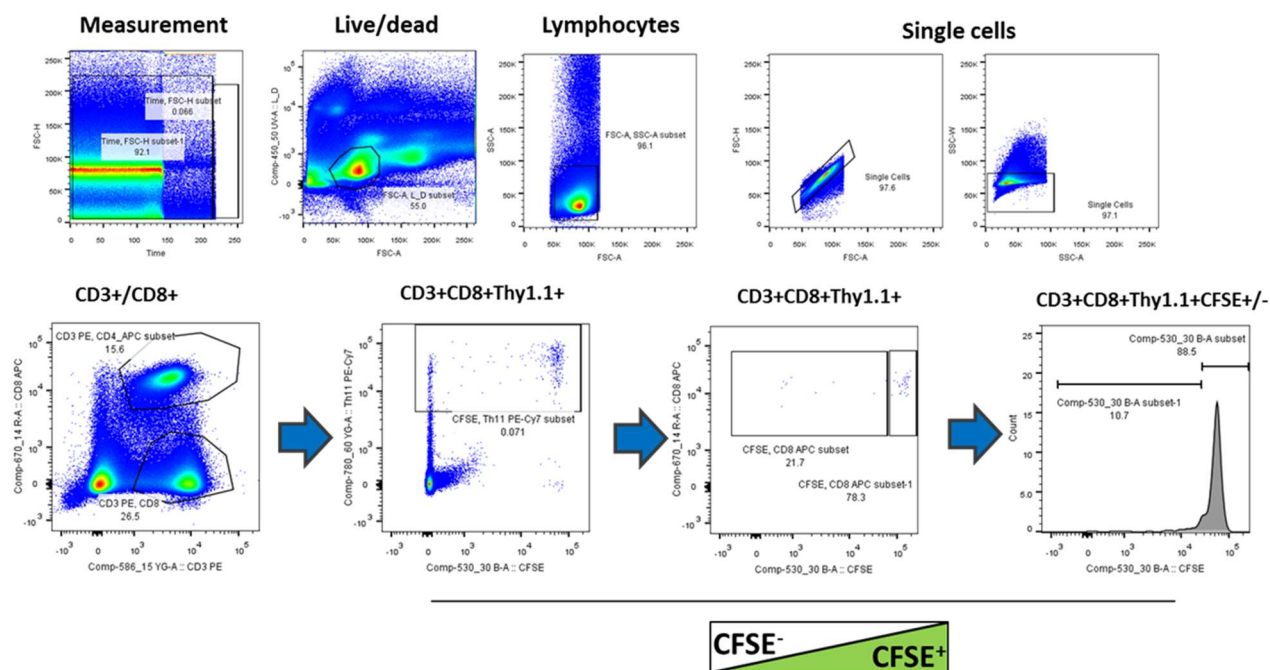

**Supplementary Figure S1:** Gating strategy of CFSE-stained Thy1.1<sup>+</sup>CD3<sup>+</sup>CD8<sup>+</sup> T cells (OTI).

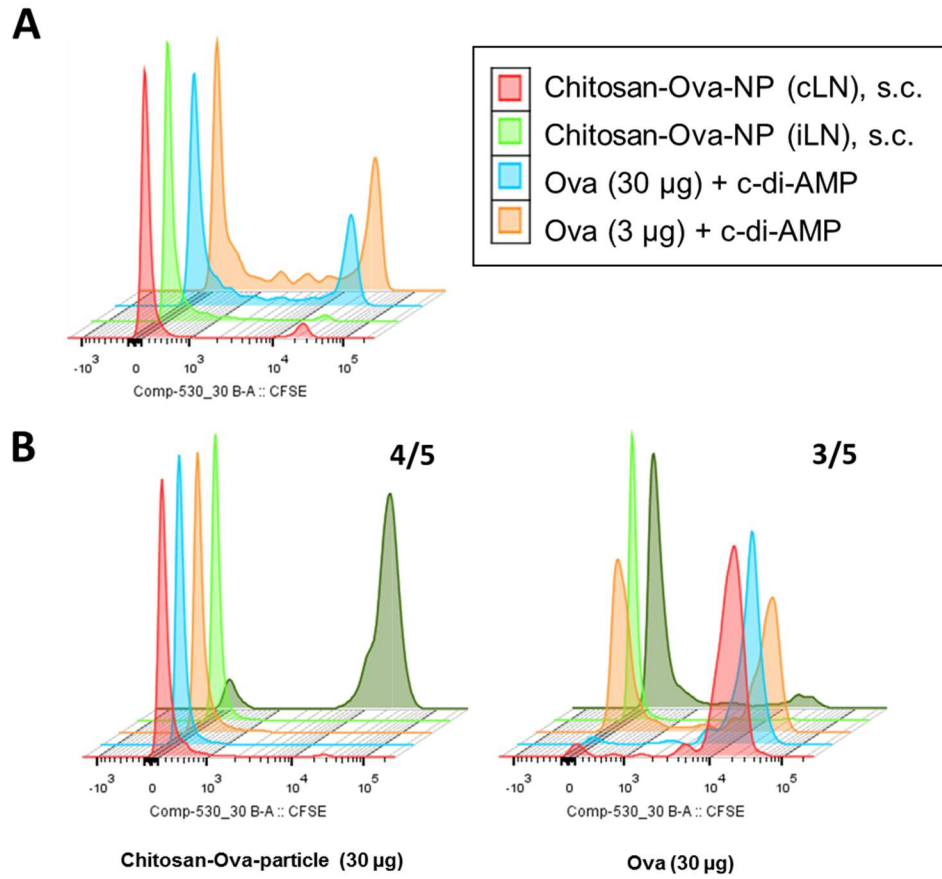

**Supplementary Figure S2: A)** Dose sparing potency using OVA protein **B).** Comparison of proliferation capacity of OVA protein vs. chitosan-OVA nanoparticles.
